# Supplementary material
Source: MDPI journal article supplement (https://www.mdpi.com/2039-4403/13/4/143)
Supplement: s1 [file s1]

## PROVINCIAL IMPLEMENTATION OF THE BABY-FRIENDLY INITIATIVE

### Supplementary S1

Theoretical Domains Framework domains with definitions and component constructs

*Adapted from:* Atkins et al., (2017). A guide to using the TDF of behaviour change to investigate implementation problems. *Implementation Science*, 12(77), 1-18.

| Component                                | Definition                                                                                                                  | Component Constructs                                                                                                                                                                         |
|------------------------------------------|-----------------------------------------------------------------------------------------------------------------------------|----------------------------------------------------------------------------------------------------------------------------------------------------------------------------------------------|
| <b>Knowledge</b>                         | An awareness of the existence of something                                                                                  | Knowledge<br>Knowledge of condition Scientific rationale<br>Procedural knowledge<br>Knowledge of environment                                                                                 |
| <b>Skills</b>                            | An ability or proficiency acquired through practice                                                                         | Skills<br>Skill development<br>Competence<br>Ability<br>Interpersonal skills<br>Practice<br>Skill assessment                                                                                 |
| <b>Social/professional role identity</b> | A coherent set of behaviours and displayed personal qualities of an individual in a social of work setting                  | Professional identity<br>Professional role<br>Social identity<br>Identity<br>Professional boundaries<br>Professional confidence<br>Group identity<br>Leadership<br>Organizational commitment |
| <b>Beliefs about capabilities</b>        | Acceptance of the truth, reality of validity about an ability, talent or facility that a person can put to constructive use | Self-confidence<br>Perceived competence<br>Self-efficacy<br>Perceived behavioural control                                                                                                    |

## PROVINCIAL IMPLEMENTATION OF THE BABY-FRIENDLY INITIATIVE

|                                   |                                                                                                                                           |                                                                                                                                                                                                                                 |
|-----------------------------------|-------------------------------------------------------------------------------------------------------------------------------------------|---------------------------------------------------------------------------------------------------------------------------------------------------------------------------------------------------------------------------------|
|                                   |                                                                                                                                           | <ul style="list-style-type: none"> <li>Beliefs</li> <li>Self-esteem</li> <li>Empowerment</li> <li>Professional confidence</li> </ul>                                                                                            |
| <b>Optimism</b>                   | The confidence that things will happen for the best of that desired goals will be attained                                                | <ul style="list-style-type: none"> <li>Optimism</li> <li>Pessimism</li> <li>Unrealistic optimism</li> <li>Identity</li> </ul>                                                                                                   |
| <b>Beliefs about consequences</b> | Acceptance of the truth, reality, or validity about outcomes of a behaviour in a given situation                                          | <ul style="list-style-type: none"> <li>Beliefs</li> <li>Outcome expectancies</li> <li>Characteristics of outcomes</li> <li>Expectancies</li> <li>Anticipated regret</li> <li>Consequences</li> </ul>                            |
| <b>Reinforcement</b>              | Increasing the probability of a response by arranging a dependent relationship, or contingency, between the response and a given stimulus | <ul style="list-style-type: none"> <li>Rewards</li> <li>Incentives</li> <li>Punishment</li> <li>Consequences</li> <li>Reinforcement</li> <li>Contingencies</li> <li>Sanctions</li> </ul>                                        |
| <b>Intentions</b>                 | A conscious decision to perform a behaviour or a resolve to act in a certain way                                                          | <ul style="list-style-type: none"> <li>Stability of intentions</li> <li>Stages of change model</li> <li>Transtheoretical model and stages of change</li> </ul>                                                                  |
| <b>Goals</b>                      | Mental representation of outcomes or end states that an individual wants to achieve                                                       | <ul style="list-style-type: none"> <li>Goals (distal/proximal)</li> <li>Goal priority</li> <li>Goal/target setting</li> <li>Goals (autonomous/controlled)</li> <li>Action planning</li> <li>Implementation intention</li> </ul> |

## PROVINCIAL IMPLEMENTATION OF THE BABY-FRIENDLY INITIATIVE

|                                                  |                                                                                                                                                                                   |                                                                                                                                                                                                 |
|--------------------------------------------------|-----------------------------------------------------------------------------------------------------------------------------------------------------------------------------------|-------------------------------------------------------------------------------------------------------------------------------------------------------------------------------------------------|
| <b>Memory, attention, and decision processes</b> | The ability to retain information, focus selectively on aspects of the environment and choose between two or more alternatives                                                    | Memory<br>Attention<br>Attention control<br>Decision making<br>Cognitive overload/tiredness                                                                                                     |
| <b>Environmental context and resources</b>       | Any circumstance of a person's environment that discourages or encourages the development of skills and abilities, independence, social competence, and adaptive behaviour        | Environmental stressors<br>Resources/material resources<br>Organizational culture/climate<br>Salient events/critical incidents<br>Person x environment interaction<br>Barriers and facilitators |
| <b>Social influences</b>                         | Those interpersonal processes that can cause individuals to change their thoughts, feelings, or behaviours                                                                        | Social pressure<br>Social norms<br>Group conformity<br>Social comparisons<br>Group norms<br>Social support<br>Power<br>Intergroup conflict<br>Alienation<br>Group identity<br>Modelling         |
| <b>Emotion</b>                                   | A complex reaction pattern involving experiential, behavioural, and physiological elements by which the individual attempts to deal with a personally significant matter or event | Fear<br>Anxiety<br>Affect (positive/negative)<br>Stress<br>Depression<br>Burn out                                                                                                               |
| <b>Behavioural regulation</b>                    | Anything aimed at managing or changing objectively observed or measured actions                                                                                                   | Self-monitoring<br>Breaking habit<br>Action planning                                                                                                                                            |

## PROVINCIAL IMPLEMENTATION OF THE BABY-FRIENDLY INITIATIVE

### Supplementary S2

Behaviour Change Wheel with definitions and intervention and policy examples

*Adapted from:* Michie et al., (2011). The behaviour change wheel: A new method for characterising and designing behaviour change interventions. *Implementation Science*, 6(42), 1-11.

| Intervention                       | Definition                                                                                                  | Examples                                                                                                                                                            |
|------------------------------------|-------------------------------------------------------------------------------------------------------------|---------------------------------------------------------------------------------------------------------------------------------------------------------------------|
| <b>Education</b>                   | Increasing knowledge or understanding                                                                       | Providing information on benefits of breastfeeding for pain management                                                                                              |
| <b>Persuasion</b>                  | Using communication to stimulate action                                                                     | Using posters and clinical practice prompts to encourage placing infants in skin-to-skin contact during procedures                                                  |
| <b>Incentivisation</b>             | Creating expectation of award                                                                               | Providing awards/recognition to clinicians who support parent-infant skin-to-skin contact during painful procedures                                                 |
| <b>Coercion</b>                    | Creating expectation of punishment or cost                                                                  | Using Adverse Events Management System reporting when infant painful procedures completed with no intervention                                                      |
| <b>Training</b>                    | Imparting skills                                                                                            | Training on completing blood work when babies are in skin-to-skin contact                                                                                           |
| <b>Restriction</b>                 | Using rules to increase the target behaviour by reducing the opportunities to engage in competing behaviour | Restricting use of pharmacologic strategies to promote parent-led interventions                                                                                     |
| <b>Environmental restructuring</b> | Changing the physical or social context                                                                     | Putting in place necessary physical infrastructure (stools) to enable clinicians to complete procedures with ergonomic safety when infants are being held by parent |
| <b>Modelling</b>                   | Providing an example for people to aspire to or imitate                                                     | Using respected clinical leaders to model use of breastfeeding during painful                                                                                       |

## PROVINCIAL IMPLEMENTATION OF THE BABY-FRIENDLY INITIATIVE

|                   |                                                                                       |                                                                                                                              |
|-------------------|---------------------------------------------------------------------------------------|------------------------------------------------------------------------------------------------------------------------------|
|                   |                                                                                       | procedures                                                                                                                   |
| <b>Enablement</b> | Increasing means/reducing barriers to increase capability or opportunity <sup>a</sup> | Having sufficient staff to support use of parental pain-relieving interventions; ensuring families present during procedures |

<sup>a</sup>Capability beyond having required education and training; opportunity beyond environmental restructuring
